# Supplementary material
Source: PubMed Central journal article supplement (PMC2828682)

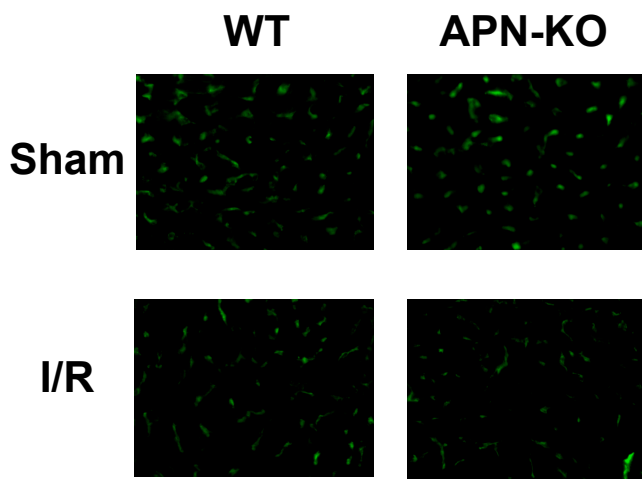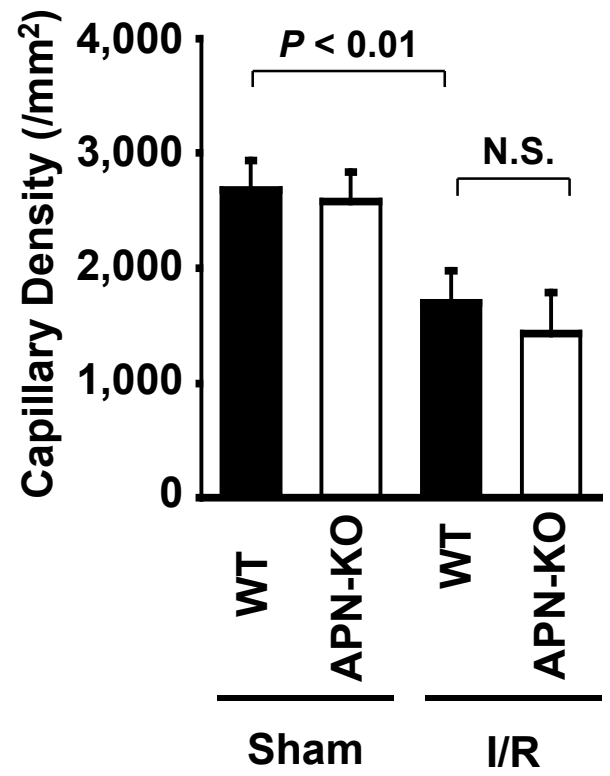

Supplementary Fig. 1

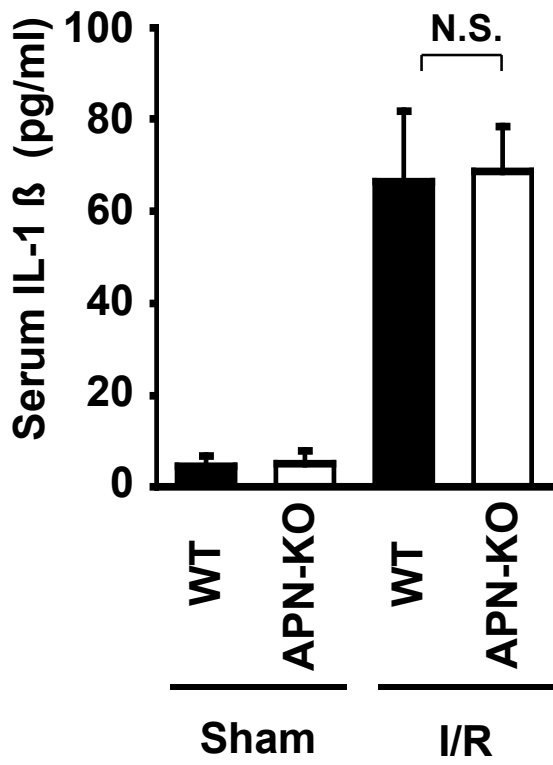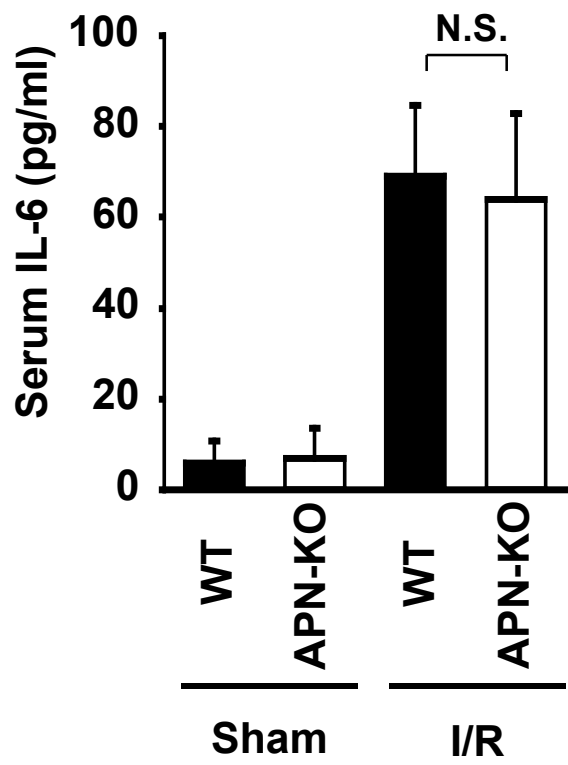

Supplementary Fig. 2

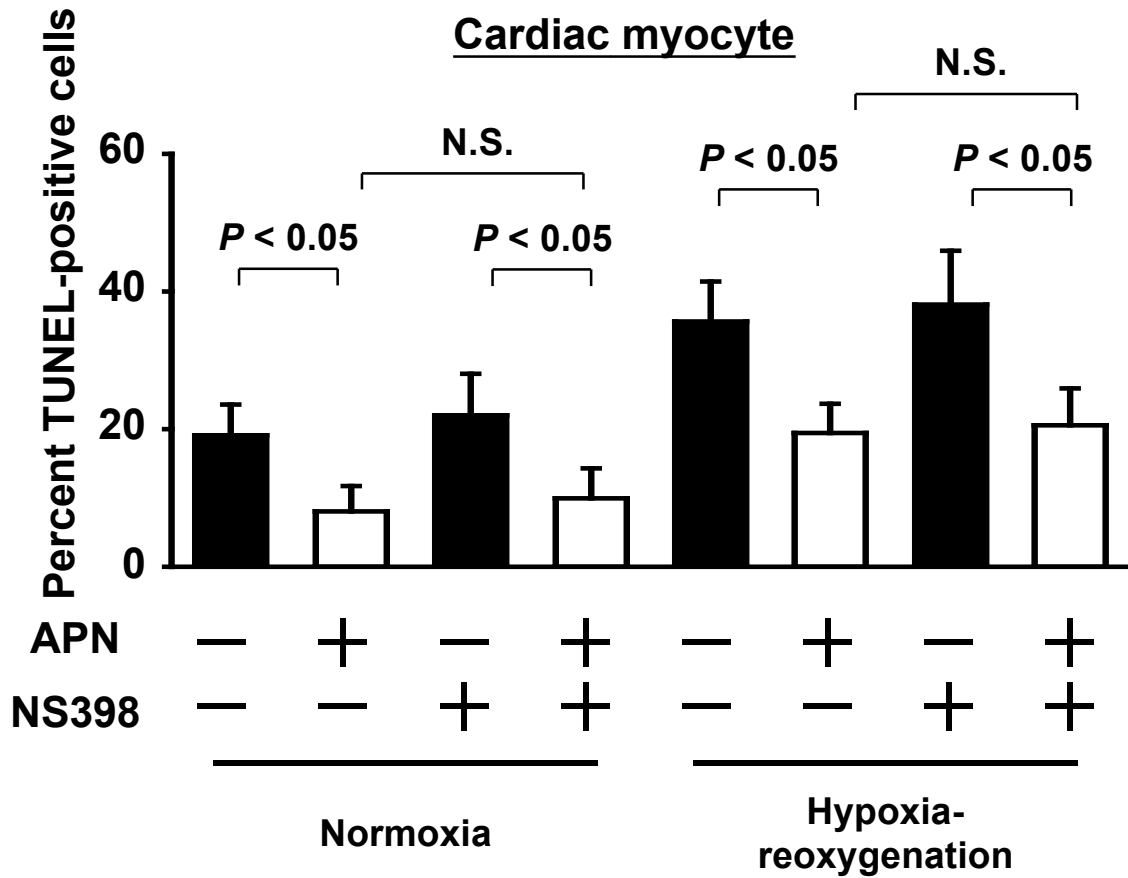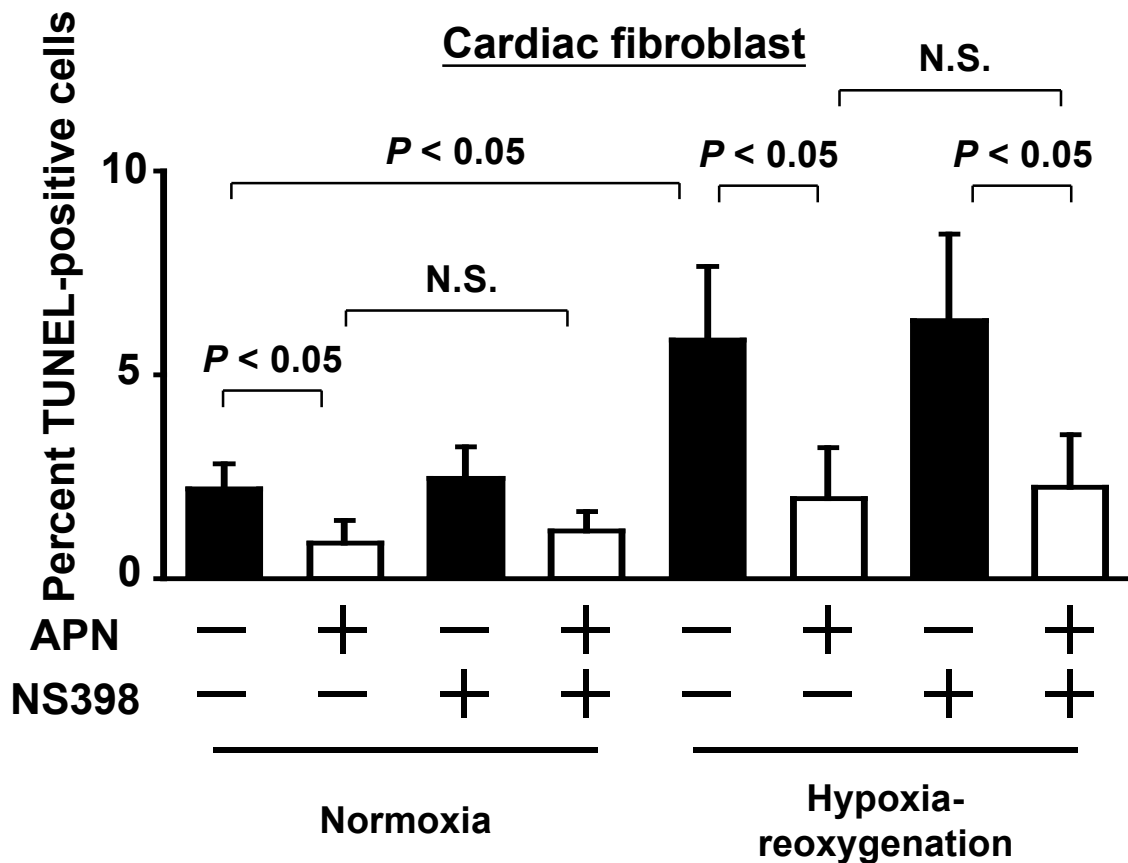

Supplementary Fig. 3

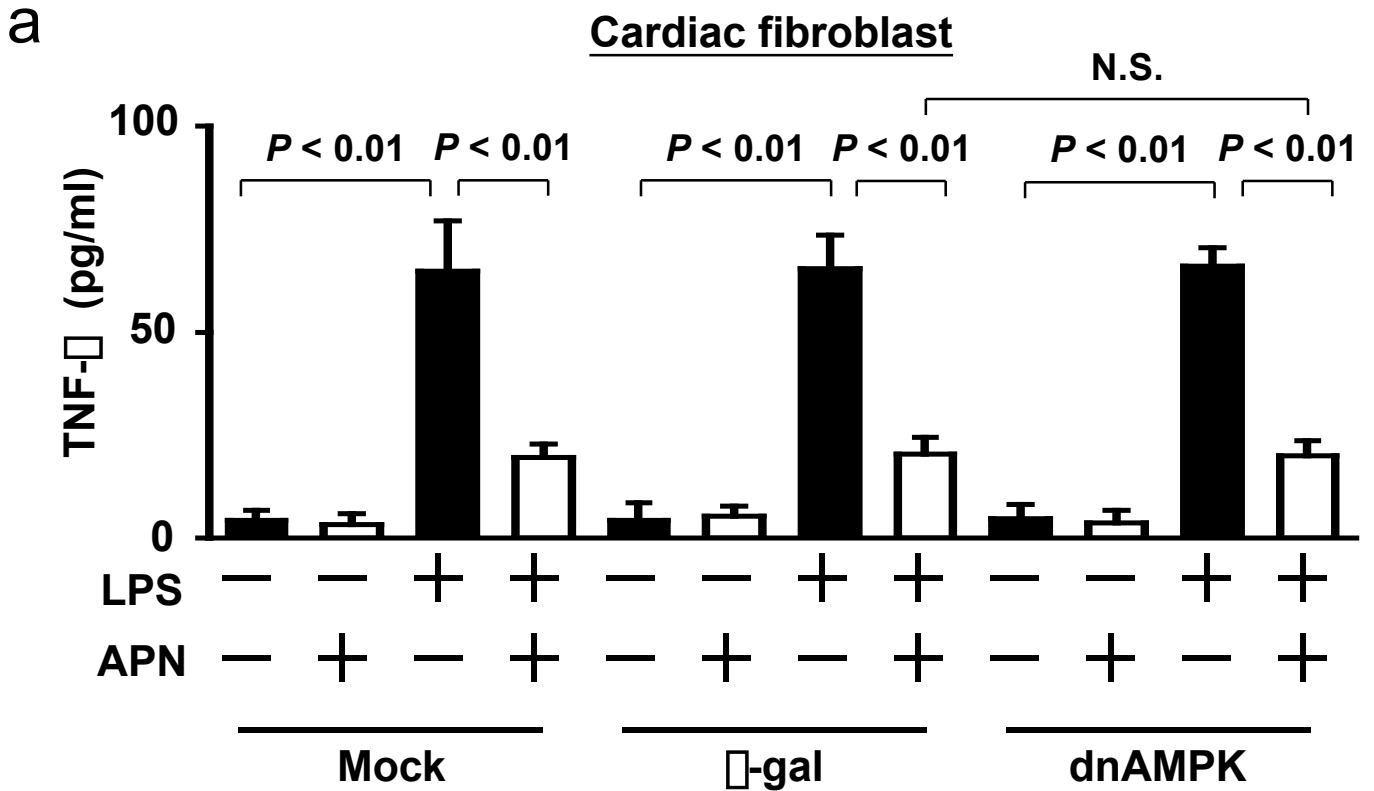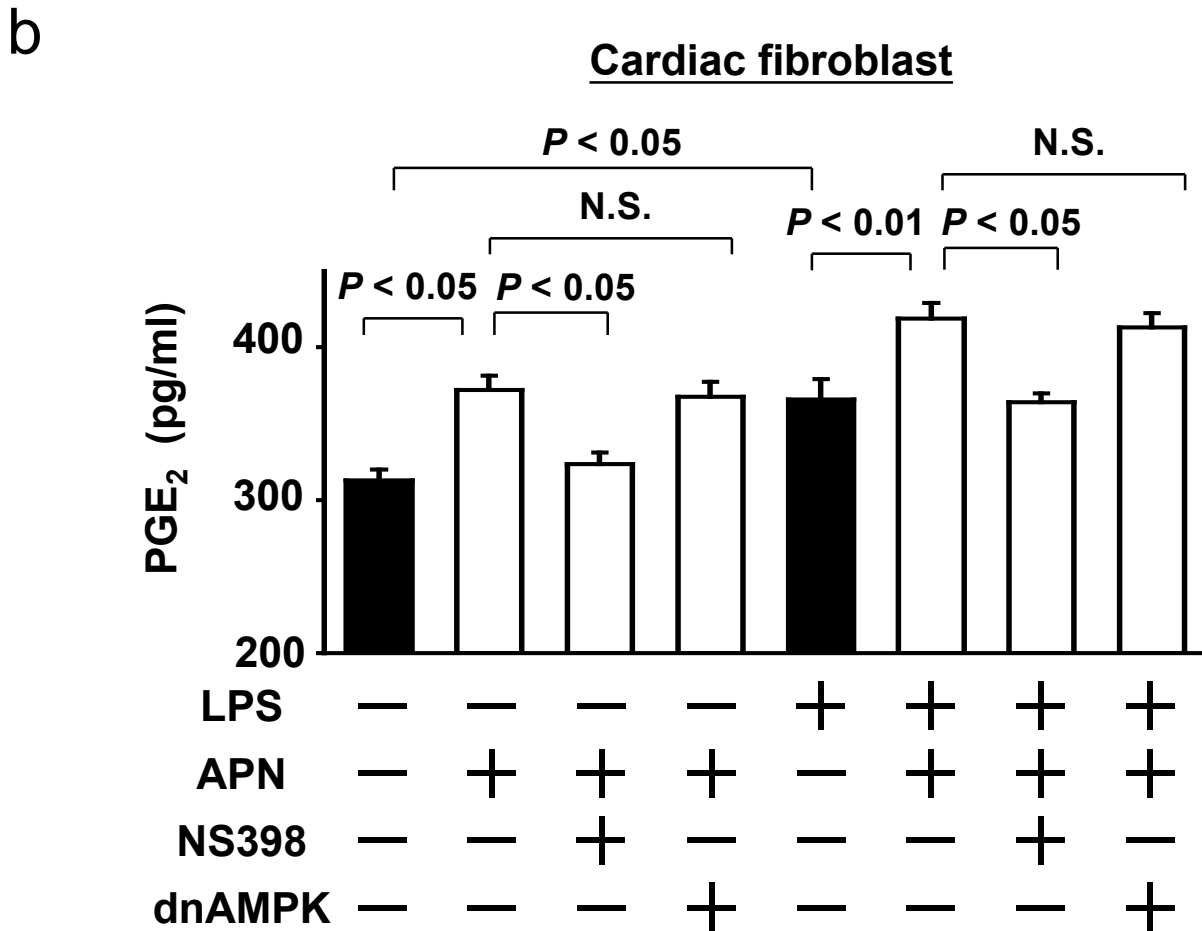

Supplementary Fig. 4

C

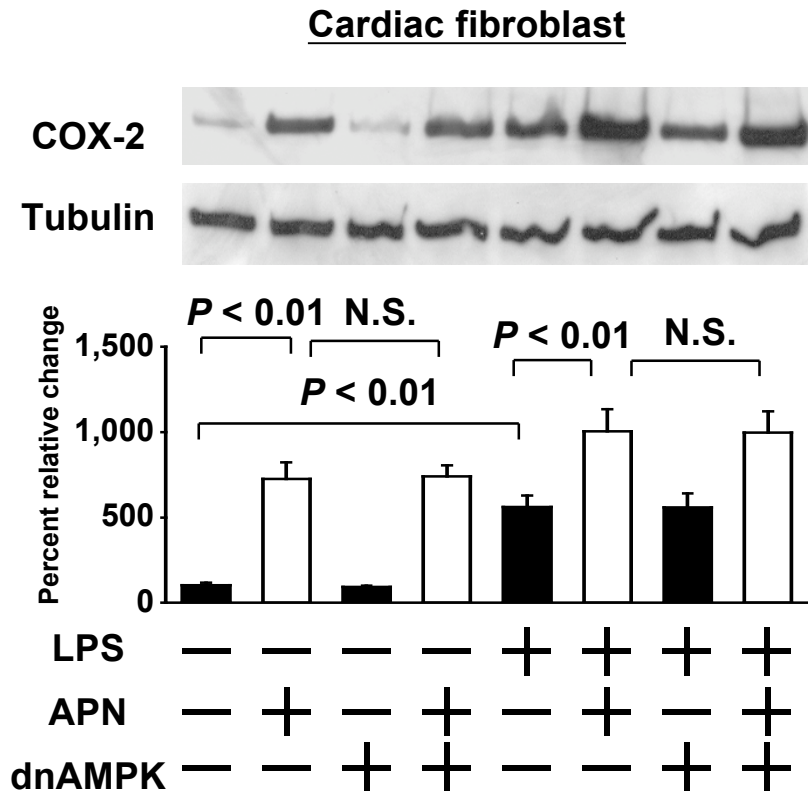

d

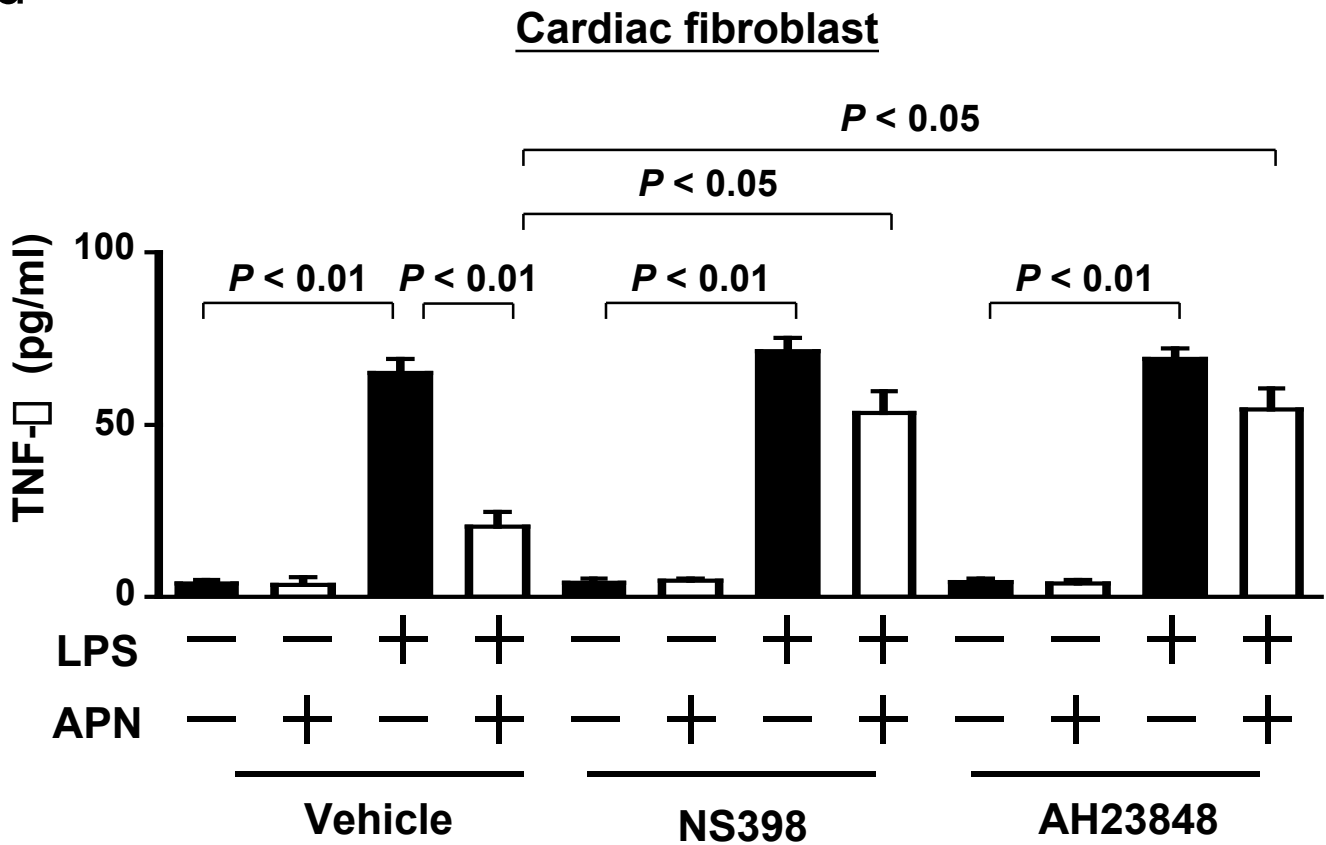

Supplementary Fig. 4

## Adult cardiac myocyte

a

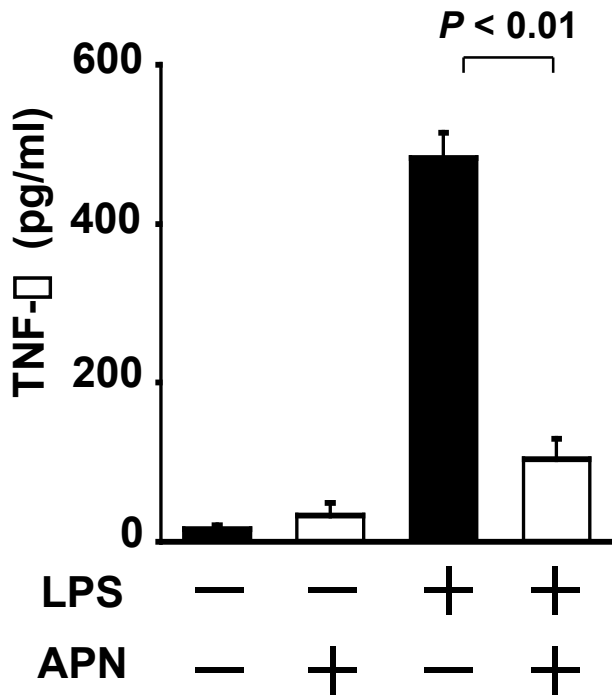

b

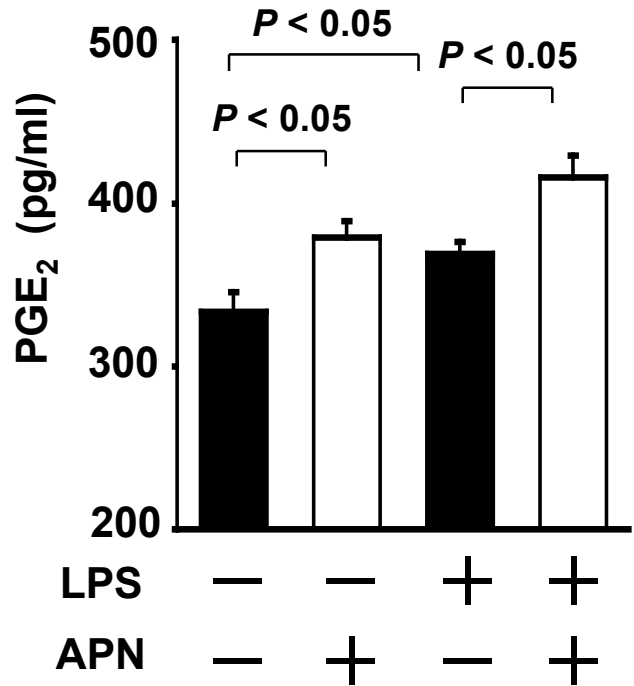

c

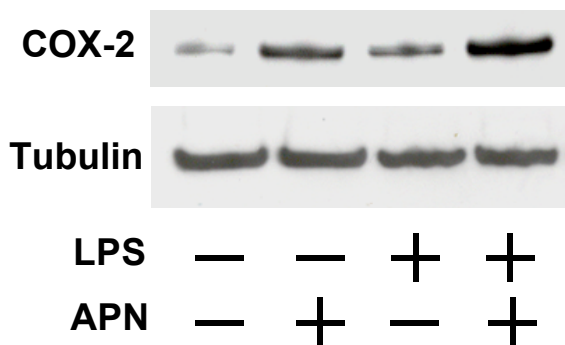

Supplement: NIHMS173613-supplement-Suppl_Figures.pdf [file NIHMS173613-supplement-Suppl_Figures.pdf]
